# Supplementary material
Source: MDPI journal article supplement (https://www.mdpi.com/search?q=water-12-03070)
Supplement: s001 [file water-12-03070-s001.pdf]

Supporting information for

# Small patches of riparian woody vegetation enhance macroinvertebrates biodiversity in a Belgian catchment.

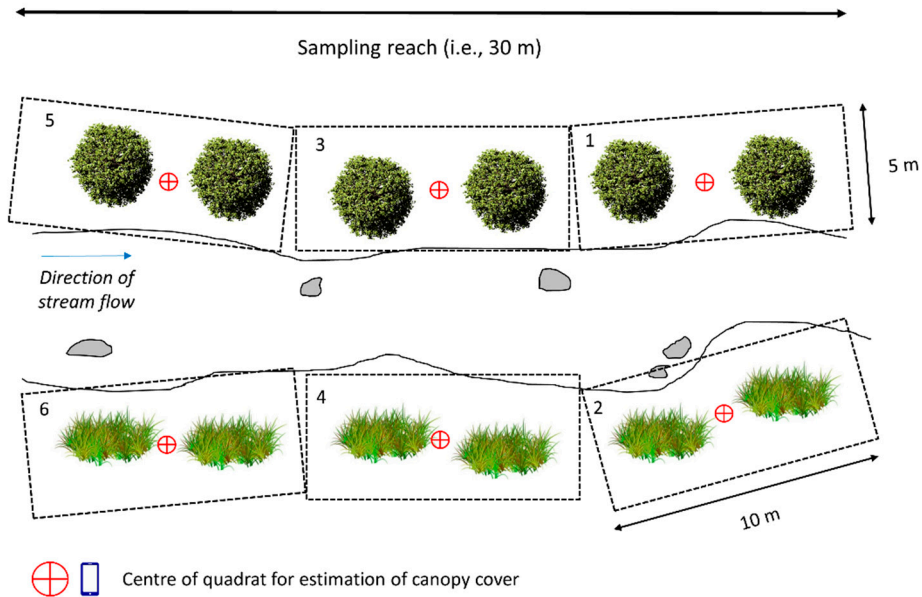

Figure S1. Sampling scheme for terrestrial vegetation and habitat assessment (after Burdon, et al. [1]).

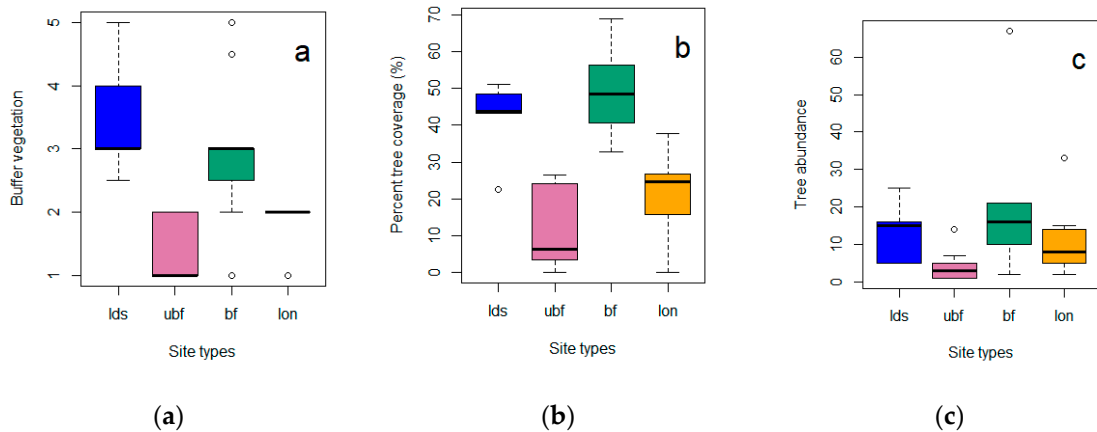

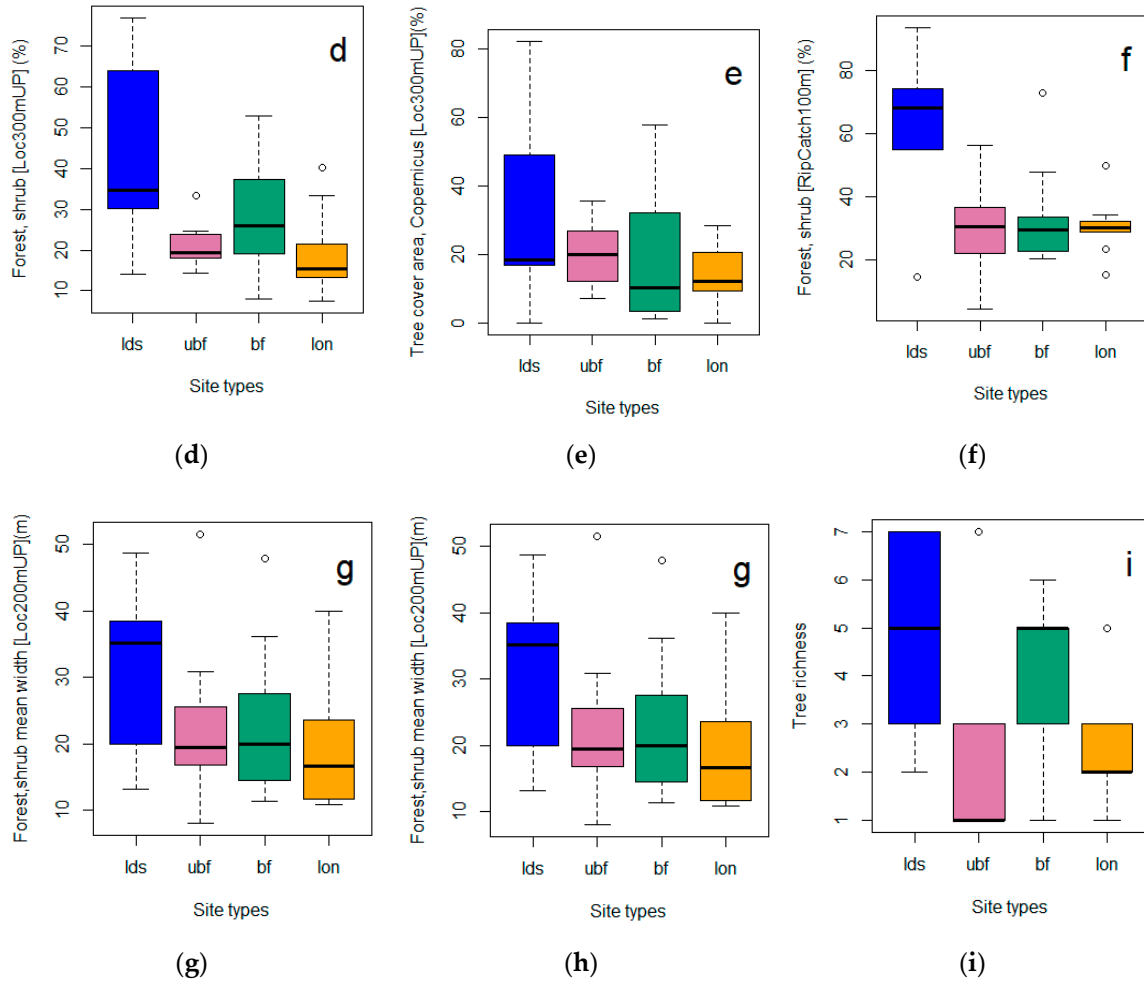

**Figure S2.** Boxplots of the quick assessment riparian attribute buffer vegetation (a), quantitative assessment riparian attributes percent tree coverage (b) and tree abundance (c), GIS-based quantification riparian attributes forest, tree shrub area in spatial units Loc300mUP obtained from 1 m resolution (d), tree cover area in spatial units Loc300mUP obtained from 30 m resolution (e), forest, tree shrub area in spatial units RipCatch100m (f), mean width of forest, shrub in spatial units Loc200mUP (g), mean width of forest, shrub in spatial units Loc300mUP (h) and tree richness obtained from quantitative sampling method (i) with respect to the site types lds (least-disturbed sites), ubf (unbuffered), bf (buffered), and lon (downstream).

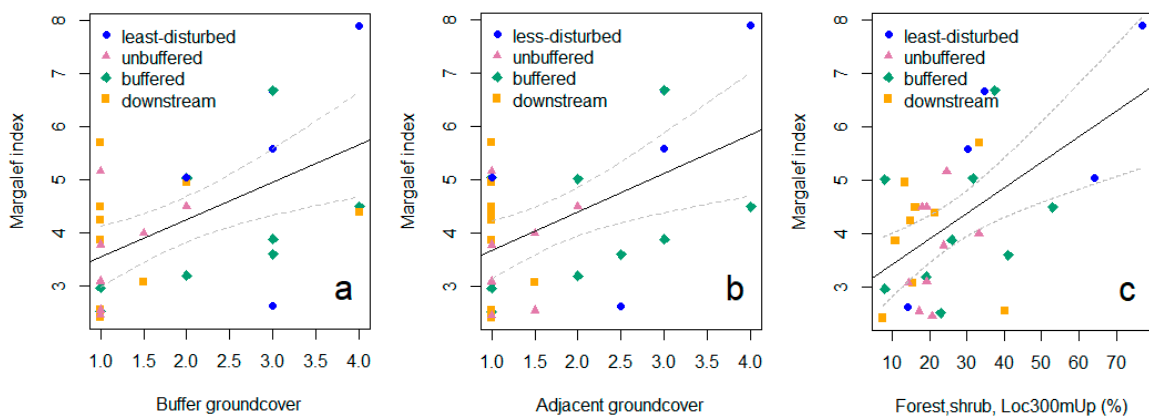

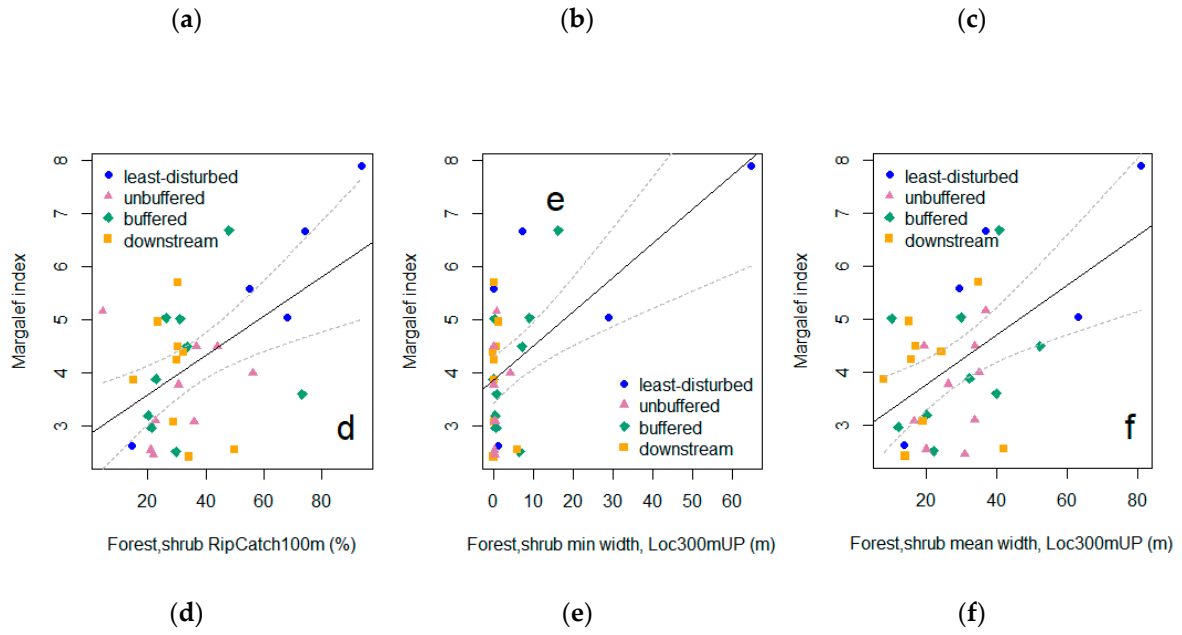

**Figure S3.** Mean Margalef index in relation to the quick assessment method, buffer ground cover (a) and adjacent ground cover (b), and GIS methods, forest, shrub in spatial units Loc300mUP (c) RipCatch100m (d), minimum and mean width of trees in spatial unit Loc300mUP (e & f, respectively) are represented by grey lines. Grey dash lines are the confidence interval and the dots represents the sampling points.

**Table S1.** Riparian attributes considered in the study.

| Riparian attributes            | Min | Max   | Median | Mean  |
|--------------------------------|-----|-------|--------|-------|
| <b>Quick assessment</b>        |     |       |        |       |
| Adjacent groundcover           | 1   | 4     | 1      | 1.70  |
| Adjacent vegetation            | 1   | 5     | 1      | 1.59  |
| Bank stability                 | 2   | 4.5   | 3      | 3.06  |
| Buffer groundcover             | 1   | 4     | 1.75   | 1.91  |
| Buffer intactness              | 1.5 | 5     | 4      | 3.52  |
| Buffer vegetation              | 1   | 5     | 2      | 2.28  |
| Buffer width                   | 1   | 4     | 2      | 2.08  |
| Land slope                     | 1   | 5     | 4      | 3.81  |
| Livestock access               | 2   | 5     | 4      | 4.02  |
| Rills channel                  | 3   | 5     | 5      | 4.73  |
| Riparian soil                  | 1   | 3     | 3      | 2.70  |
| Shading                        | 1   | 4.5   | 3      | 2.71  |
| Soil drainage                  | 2   | 4     | 3      | 2.98  |
| Riparian Condition Index (RCI) | 27  | 52.5  | 36     | 37.11 |
| <b>Quantitative assessment</b> |     |       |        |       |
| Tree richness                  | 1   | 7     | 3      | 3.22  |
| Tree abundance                 | 1   | 67    | 8      | 11.84 |
| Percent coverage area (%)      | 0   | 68.99 | 26.63  | 29.43 |
| Bare ground (%)                | 0   | 33.15 | 1.33   | 5.52  |
| Herb (%)                       | 0   | 90.27 | 24.58  | 30.84 |
| Impervious (%)                 | 0   | 75    | 0      | 10.88 |
| Managed grass (%)              | 0   | 85.22 | 34.69  | 33.60 |
| Unmanaged grass (%)            | 0   | 55.97 | 11.92  | 15.11 |
| Mosses, lichen (%)             | 0   | 8.33  | 0.11   | 0.77  |
| Plant litter (%)               | 0   | 42.82 | 0.30   | 3.90  |

| <b>Riparian attributes</b>                        | <b>Min</b> | <b>Max</b> | <b>Median</b> | <b>Mean</b> |
|---------------------------------------------------|------------|------------|---------------|-------------|
| Rock bedrock (%)                                  | 0          | 1          | 0             | 0.06        |
| Shrub (%)                                         | 0          | 19.5       | 0.89          | 3.09        |
| <i>Fraxinus excelsior</i> abundance               | 0          | 12         | 1             | 1.94        |
| <i>Populus canadensis</i> abundance               | 0          | 10         | 0             | 1.84        |
| <b>Quantification based on GIS</b>                |            |            |               |             |
| <i>Local riparian attributes</i>                  |            |            |               |             |
| Agricultural (Loc100mUP) (m <sup>2</sup> )        | 0          | 1667.3     | 0             | 171.7       |
| Agricultural (Loc200mUP) (m <sup>2</sup> )        | 0          | 3084.3     | 0             | 305.4       |
| Agricultural (Loc300mUP) (%)                      | 0.14       | 42.7       | 7.1           | 9.9         |
| Forest, shrub (Loc100mUP) (m <sup>2</sup> )       | 15.1       | 4914.3     | 987.8         | 1571        |
| Forest, shrub (Loc200mUP) (m <sup>2</sup> )       | 57.7       | 8928       | 2286.9        | 3105.2      |
| Forest, shrub (Loc300mUP) (%)                     | 7.18       | 77.1       | 21.1          | 25.9        |
| Pasture, grassland (Loc100mUP) (m <sup>2</sup> )  | 0          | 4721       | 2712          | 2699        |
| Pasture, grassland (Loc200mUP) (m <sup>2</sup> )  | 234.3      | 8973.5     | 4985.2        | 5275.5      |
| Pasture, grassland (Loc300mUP) (%)                | 22.9       | 85.9       | 63.3          | 60.5        |
| Urban, industrial (Loc100mUP) (m <sup>2</sup> )   | 0          | 660        | 0             | 90.52       |
| Urban, industrial (Loc200mUP) (m <sup>2</sup> )   | 0          | 2029.6     | 6             | 200.5       |
| Urban, industrial (Loc300mUP) (%)                 | 0.13       | 69.3       | 4.0           | 9.4         |
| Wetland, waterbodies (Loc300mUP) (%)              | 0.003      | 1.47       | 0.03          | 0.21        |
| Tree cover area (Loc300mUP) (%)                   | 0          | 82.3       | 17.7          | 20.8        |
| Tree cover density (Loc300mUP) (%)                | 0          | 93.8       | 69.4          | 68.2        |
| <i>Local riparian width attributes</i>            |            |            |               |             |
| Agricultural minimum width (Loc300mUP) (m)        | 0.014      | 34.7       | 0.32          | 3.23        |
| Agricultural mean width (Loc300mUP) (m)           | 1.183      | 44.7       | 25.3          | 24.4        |
| Forest, shrub minimum width (Loc100mUP) (m)       | 0          | 39.7       | 1.1           | 5.6         |
| Forest, shrub minimum width (Loc200mUP) (m)       | 0.1        | 39         | 0.7           | 3.6         |
| Forest, shrub minimum width (Loc300mUP) (m)       | 0.007      | 64.94      | 0.42          | 5.01        |
| Forest, shrub mean width (Loc100mUP) (m)          | 2.3        | 49         | 17.4          | 20.9        |
| Forest, shrub mean width (Loc200mUP) (m)          | 8          | 51.6       | 19.7          | 23.3        |
| Forest, shrub mean width (Loc300mUP) (m)          | 8.13       | 81.1       | 28            | 29.08       |
| Pasture, grassland minimum width (Loc300mUP) (m)  | 0.06       | 65.13      | 12.82         | 16.68       |
| Pasture, grassland mean width (Loc300mUP) (m)     | 23.79      | 88.56      | 65.48         | 61.96       |
| Urban, industrial minimum width (Loc300mUP) (m)   | 0.01       | 4.57       | 0.24          | 0.64        |
| Urban, industrial mean width (Loc300mUP) (m)      | 0.9        | 66.4       | 9.7           | 15.1        |
| <i>Full riparian corridor attributes</i>          |            |            |               |             |
| Agricultural (RipCatch100) (%)                    | 1.0        | 38.8       | 10.4          | 10.3        |
| Forest, shrub (RipCatch100) (%)                   | 4.5        | 93.7       | 30.6          | 36.3        |
| Pasture, grassland (RipCatch100) (%)              | 6.2        | 72.2       | 51.2          | 48.7        |
| Urban, industrial (RipCatch100) (%)               | 0.002      | 23.3       | 3.09          | 5.58        |
| Wetland, waterbodies (RipCatch100) (%)            | 0.0013     | 75.5       | 32.5          | 34.4        |
| Tree cover area (RipCatch100) (%)                 | 0          | 82.3       | 17.7          | 20.8        |
| Tree cover density (RipCatch100) (%)              | 0          | 93.8       | 69.4          | 68.2        |
| Distance to 100 m forest blocks (RipCatch100) (m) | 0          | 389.8      | 139.1         | 150.8       |
| Distance to 50 m forest blocks (RipCatch100) (m)  | 0          | 145.3      | 51.5          | 53.4        |
| Distance to 25 m forest blocks (RipCatch100) (m)  | 1.6        | 76.8       | 15.9          | 18.9        |

**Table S2.** Subjective scores for riparian attributes used to calculate an index of riparian condition (from Harding, *et al.* [2], after Burdon *et al.* [1]).

| Attributes                                                                     |               | Scores 1                                                                                            | Scores 2                                                                                         | Scores 3                                                                                                                      | Scores 4                                                                                                                                | Scores 5                                                                                                   |
|--------------------------------------------------------------------------------|---------------|-----------------------------------------------------------------------------------------------------|--------------------------------------------------------------------------------------------------|-------------------------------------------------------------------------------------------------------------------------------|-----------------------------------------------------------------------------------------------------------------------------------------|------------------------------------------------------------------------------------------------------------|
| <b>Shading of water</b>                                                        |               | Little or no shading                                                                                | 10-25% shading                                                                                   | 25-50%                                                                                                                        | 50-80%                                                                                                                                  | >80%                                                                                                       |
| <b>Buffer width</b>                                                            |               | <1 m                                                                                                | 1-5 m                                                                                            | 5-15 m                                                                                                                        | 15-30 m                                                                                                                                 | >30 m                                                                                                      |
| <b>Buffer intactness</b>                                                       |               | Buffer absent                                                                                       | 50-99% gaps                                                                                      | 20-50% gaps                                                                                                                   | 1-20% gaps                                                                                                                              | Completely intact                                                                                          |
| <b>Vegetation comp. of buffer and/or adjacent land to 30 m from streambank</b> | Buffer        | Short grazed pasture grasses to stream edge, or impervious surfaces                                 | Invasive weedy shrubs gorse, blackberry, broom, or mainly high grasses or low shrubs 0.3-2 m     | Deciduous tree dominated; small tree dom. (2-5 m); or forest plantation with <25% cover of >5 m trees; or natural grassy veg. | Regenerating forest or woodlot evergreens with >25% cover sub-canopy (>5 m) trees but <10% canopy trees (>12 m); or natural grassy veg. | Maturing forest including >10% cover canopy trees (>12 m); or natural wetland or natural grassy vegetation |
|                                                                                | Adjacent land |                                                                                                     |                                                                                                  |                                                                                                                               |                                                                                                                                         |                                                                                                            |
| <b>Bank stability</b>                                                          |               | Very low: uncohesive sediments & few roots & >40% recently eroded                                   | Low: uncohesive sediments & few roots/low veg. cover & >15-40% recently eroded                   | Moderate: stabilized by geology (e.g. cobbles), veg cover &/or roots & >5-15% recently eroded                                 | High: stabilized by geology (e.g. bedrock), veg. cover &/or roots; & 1-5% recently eroded                                               | Very high: stabilized by geology (e.g. bedrock), veg. cover &/or roots; <1% recently eroded                |
| <b>Livestock access</b>                                                        |               | High: unfenced and unmanaged with active livestock use                                              | Moderate: some livestock access                                                                  | Limited: unfenced but low stocking, bridges, troughs, natural deterrents                                                      | Very limited: temporary fencing of all livestock or naturally very limited access                                                       | None: permanent fencing or no livestock                                                                    |
| <b>Riparian soil denitrification potential</b>                                 |               | Soils dry/firm underfoot or moist-wet but frequent tile drains bypass riparian soils (≥3 per 100 m) | 1-30% streambank soils moist but firm or moist-wet with infrequent bypass drains (1-2 per 100 m) | ≥30% streambank soils moist but firm underfoot. No drains.                                                                    | 1-30% streambank soils water-logged, soft underfoot with black soil. No drains.                                                         | ≥30% of streambanks water-logged, surface moist/fluid underfoot. No drains.                                |
| <b>Land slope 0-30 m from stream bank</b>                                      |               | >35°                                                                                                | >20-35°                                                                                          | >10-20°                                                                                                                       | >5-10°                                                                                                                                  | 0-5°                                                                                                       |
| <b>Groundcover of buffer and/or adjacent land to 30 m from streambank</b>      | Buffer        | Bare                                                                                                | Short/regularly grazed pasture (<3 cm)                                                           | Pasture grass/tussock with bare flow paths or 2-3 cm tree litter layer                                                        | Moderate density grass or dense (>3 cm) tree litter layer                                                                               | High density long grass                                                                                    |
|                                                                                | Adjacent land |                                                                                                     |                                                                                                  |                                                                                                                               |                                                                                                                                         |                                                                                                            |
| <b>Soil drainage</b>                                                           |               | Impervious (e.g. sealed) or extensively pugged                                                      | Low permeability (e.g. high clay content) or moderately pugged/compacted soil                    | Low-moderate permeability (e.g. silt/loam) and not pugged/compacted                                                           | Mod-high permeability (e.g. sandy loam) & not pugged/compacted                                                                          | Very high permeability (e.g. pumice/sand) & not pugged/compacted                                           |

|                       | and/or compacted soil                                               |                                                                       |                                                         |                                                 |      |
|-----------------------|---------------------------------------------------------------------|-----------------------------------------------------------------------|---------------------------------------------------------|-------------------------------------------------|------|
| <b>Rills/channels</b> | Frequent rills (> 9 per 100 m) or larger channels carry most runoff | Common rills (4-9 per 100 m) or 1-2 larger channels carry some runoff | Infrequent rills (2-3 per 100 m) and no larger channels | Rare rills (1 per 100 m) and no larger channels | None |

Table S3. Stream invertebrates found in the Zwalm River basin.

| Class        | Order             | Family          | Aquatic invertebrate taxa            | Number of individuals |
|--------------|-------------------|-----------------|--------------------------------------|-----------------------|
| Malacostraca | Amphipoda         | Gammaridae      | <i>Gammarus</i> sp.                  | 18503                 |
| Hirudinea    | Arhynchobedellida | Erpobdellidae   | <i>Erpobdella octoculata</i>         | 93                    |
| Insecta      | Coleoptera        | Hydrophilidae   | <i>Anacaena globulus</i>             | 5                     |
| Insecta      | Coleoptera        | Dytiscidae      | Dytiscidae Gen. sp.                  | 3                     |
| Insecta      | Coleoptera        | Elmidae         | <i>Elmis aenea</i>                   | 23                    |
| Insecta      | Coleoptera        | Hydrophilidae   | <i>Helophorus</i> sp.                | 4                     |
| Insecta      | Coleoptera        | Scirtidae       | Scirtidae Gen. sp.                   | 38                    |
| Insecta      | Diptera           | Stratiomyidae   | <i>Beris</i> sp.                     | 1                     |
| Insecta      | Diptera           | Ceratopogonidae | Ceratopogonidae Gen. sp.             | 28                    |
| Insecta      | Diptera           | Chironomidae    | Chironomidae Gen. sp.                | 3012                  |
| Insecta      | Diptera           | Chironomidae    | Chironominae Gen. sp.                | 2862                  |
| Insecta      | Diptera           | Culicidae       | <i>Culex pipiens</i>                 | 139                   |
| Insecta      | Diptera           | Limoniidae      | <i>Dicranota</i> sp.                 | 179                   |
| Insecta      | Diptera           | Dolichopodidae  | Dolichopodidae Gen. sp.              | 2                     |
| Insecta      | Diptera           | Limoniidae      | <i>Eloeophila</i> sp.                | 16                    |
| Insecta      | Diptera           | Limoniidae      | <i>Erioptera</i> sp.                 | 3                     |
| Insecta      | Diptera           | Limoniidae      | <i>Neolimnomyia</i> sp.              | 1                     |
| Insecta      | Diptera           | Stratiomyidae   | <i>Oplodontha viridula</i>           | 1                     |
| Insecta      | Diptera           | Chironomidae    | Orthocladinae Gen. sp.               | 294                   |
| Insecta      | Diptera           | Limoniidae      | <i>Pedicia</i> sp.                   | 1                     |
| Insecta      | Diptera           | Limoniidae      | <i>Pilaria</i> sp.                   | 4                     |
| Insecta      | Diptera           | Chironomidae    | <i>Prodiamesa olivacea</i>           | 1221                  |
| Insecta      | Diptera           | Psychodidae     | <i>Psychoda alternata</i>            | 1                     |
| Insecta      | Diptera           | Psychodidae     | <i>Psychoda parthenogenetica</i>     | 1                     |
| Insecta      | Diptera           | Ptychopteridae  | <i>Ptychoptera contaminata</i>       | 380                   |
| Insecta      | Diptera           | Ptychopteridae  | <i>Ptychoptera scutellaris</i>       | 57                    |
| Insecta      | Diptera           | Simuliidae      | <i>Simulium costatum</i>             | 1                     |
| Insecta      | Diptera           | Simuliidae      | <i>Simulium ornatum</i>              | 639                   |
| Insecta      | Diptera           | Tabanidae       | Tabanidae Gen. sp.                   | 17                    |
| Insecta      | Diptera           | Chironomidae    | Tanypodinae Gen. sp.                 | 342                   |
| Insecta      | Diptera           | Psychodidae     | Telmatoscopini Gen. sp.              | 1                     |
| Insecta      | Diptera           | Tipulidae       | <i>Tipula</i> sp.                    | 2                     |
| Insecta      | Ephemeroptera     | Baetidae        | <i>Baetis muticus</i>                | 35                    |
| Insecta      | Ephemeroptera     | Baetidae        | <i>Baetis rhodani</i>                | 399                   |
| Insecta      | Ephemeroptera     | Baetidae        | <i>Baetis vernus</i>                 | 174                   |
| Insecta      | Ephemeroptera     | Caenidae        | <i>Caenis horaria</i>                | 1                     |
| Insecta      | Ephemeroptera     | Baetidae        | <i>Centroptilum luteolum</i>         | 1                     |
| Insecta      | Ephemeroptera     | Baetidae        | <i>Cloeon dipterum</i>               | 3                     |
| Insecta      | Ephemeroptera     | Heptageniidae   | <i>Electrogena ujhelyii</i>          | 32                    |
| Insecta      | Ephemeroptera     | Ephemeridae     | <i>Ephemera danica</i>               | 67                    |
| Insecta      | Ephemeroptera     | Leptophlebiidae | <i>Paraleptophlebia submarginata</i> | 1                     |
| Insecta      | Hemiptera         | Nepidae         | <i>Nepa cinerea</i>                  | 2                     |
| Insecta      | Hemiptera         | Veliidae        | <i>Velia caprai</i>                  | 4                     |

| Class        | Order           | Family            | Aquatic invertebrate taxa        | Number of individuals |
|--------------|-----------------|-------------------|----------------------------------|-----------------------|
| Gastropoda   | Hygrophila      | Planorbidae       | <i>Ancylus fluviatilis</i>       | 1                     |
| Gastropoda   | Hygrophila      | Lymnaeidae        | <i>Lymnaea peregra</i>           | 14                    |
| Gastropoda   | Hygrophila      | Physidae          | <i>Physella acuta</i>            | 7                     |
| Malacostraca | Isopoda         | Asellidae         | Asellidae Gen. sp.               | 65                    |
| Malacostraca | Isopoda         | Asellidae         | <i>Asellus aquaticus</i>         | 2046                  |
| Gastropoda   | Littorinimorpha | Hydrobiidae       | <i>Potamopyrgus antipodarum</i>  | 1016                  |
| Insecta      | Megaloptera     | Sialidae          | <i>Sialis fuliginosa</i>         | 1                     |
| Insecta      | Odonata         | Cordulegastriidae | <i>Cordulegaster boltonii</i>    | 10                    |
| Insecta      | Odonata         | Libellulidae      | <i>Orthetrum cancellatum</i>     | 1                     |
| Oligochaeta  | Opisthopora     | Lumbricidae       | Lumbricidae Gen. sp.             | 8                     |
| Hirudinea    | Rhynchopdellida | Glossiphoniidae   | <i>Glossiphonia complanata</i>   | 22                    |
| Hirudinea    | Rhynchopdellida | Glossiphoniidae   | <i>Glossiphonia concolor</i>     | 1                     |
| Hirudinea    | Rhynchopdellida | Glossiphoniidae   | <i>Glossiphonia nebulosa</i>     | 6                     |
| Hirudinea    | Rhynchopdellida | Glossiphoniidae   | <i>Helobdella stagnalis</i>      | 24                    |
| Hirudinea    | Rhynchopdellida | Glossiphoniidae   | <i>Theromyzon tessulatum</i>     | 1                     |
| Turbellaria  | Seriata         | Dendrocoelidae    | <i>Dendrocoelum lacteum</i>      | 25                    |
| Turbellaria  | Seriata         | Dugesiidae        | <i>Dugesia gonocephala</i>       | 69                    |
| Insecta      | Trichoptera     | Glossosomatidae   | <i>Agapetus fuscipes</i>         | 21                    |
| Insecta      | Trichoptera     | Limnephilidae     | <i>Chaetopteryx villosa</i>      | 296                   |
| Insecta      | Trichoptera     | Limnephilidae     | <i>Enoicyla pusilla</i>          | 1                     |
| Insecta      | Trichoptera     | Hydropsychidae    | <i>Hydropsyche angustipennis</i> | 103                   |
| Insecta      | Trichoptera     | Hydropsychidae    | <i>Hydropsyche fulvipes</i>      | 45                    |
| Insecta      | Trichoptera     | Psychomyiidae     | <i>Lype reducta</i>              | 2                     |
| Insecta      | Trichoptera     | Polycentropodidae | <i>Plectrocnemia conspersa</i>   | 3                     |
| Insecta      | Trichoptera     | Limnephilidae     | <i>Potamophylax cingulatus</i>   | 7                     |
| Insecta      | Trichoptera     | Sericostomatidae  | <i>Sericostoma personatum</i>    | 43                    |
| Insecta      | Trichoptera     | Goeridae          | <i>Silo pallipes</i>             | 1                     |
| Oligochaeta  | Tubificida      | Naididae          | Naididae Gen. sp.                | 12960                 |
| Bivalvia     | Venerida        | Sphaeriidae       | <i>Pisidium</i> sp.              | 5                     |
| Bivalvia     | Venerida        | Sphaeriidae       | <i>Sphaerium</i> sp.             | 3                     |



**Table S4.** Terrestrial invertebrates found in the Zwalm River basin.

| <b>Taxa</b>                     | <b>Number of individuals</b> |
|---------------------------------|------------------------------|
| Araneae                         |                              |
| <i>Agelena labyrinthica</i>     | 72                           |
| Agelenidae                      | 26                           |
| <i>Anelosimus vittatus</i>      | 1                            |
| <i>Antistea elegans</i>         | 1                            |
| <i>Anyphaena accentuata</i>     | 5                            |
| Araneidae                       | 97                           |
| <i>Araniella cucurbitina</i>    | 4                            |
| <i>Araniella opisthographa</i>  | 4                            |
| <i>Cheiracanthium erraticum</i> | 1                            |
| <i>Clubiona corticalis</i>      | 1                            |
| <i>Clubiona lutescens</i>       | 1                            |
| <i>Clubiona terrestris</i>      | 1                            |
| Clubionidae                     | 31                           |
| <i>Coelotes terrestris</i>      | 3                            |
| <i>Cyclosa conica</i>           | 1                            |
| <i>Diaea dorsata</i>            | 1                            |
| <i>Drassodes lapidosus</i>      | 1                            |
| <i>Enoplognatha ovata</i>       | 91                           |
| <i>Episinus angulatus</i>       | 1                            |
| <i>Eratigena picta</i>          | 6                            |
| Gnaphosidae                     | 5                            |
| <i>Harpactea hombergi</i>       | 1                            |
| <i>Larinioides cornutus</i>     | 2                            |
| Linyphiidae                     | 120                          |
| Lycosidae                       | 41                           |
| <i>Mangora acalypha</i>         | 16                           |
| <i>Metellina mendei</i>         | 8                            |
| <i>Metellina merianae</i>       | 1                            |
| <i>Neriere emphana</i>          | 1                            |
| <i>Neriere montana</i>          | 1                            |
| <i>Nigma flavescens</i>         | 1                            |
| <i>Nuctenea umbratica</i>       | 1                            |
| <i>Pachygnatha degeeri</i>      | 1                            |
| Philodromidae                   | 55                           |
| <i>Philodromus albidus</i>      | 2                            |
| <i>Philodromus cespitum</i>     | 2                            |
| <i>Piratula hygrophila</i>      | 2                            |
| <i>Pisaura mirabilis</i>        | 17                           |
| Salticidae                      | 11                           |
| <i>Segestria senoculata</i>     | 1                            |
| <i>Tetragnatha extensa</i>      | 5                            |
| <i>Tetragnatha montana</i>      | 42                           |
| Tetragnathidae                  | 5                            |
| <i>Textrix denticulata</i>      | 1                            |
| Theridiidae                     | 3                            |
| <i>Theridion pictum</i>         | 2                            |
| <i>Theridion varians</i>        | 3                            |
| Thomisidae                      | 14                           |
| <i>Trachyzelotes pedestris</i>  | 3                            |

| <b>Taxa</b>                     | <b>Number of individuals</b> |
|---------------------------------|------------------------------|
| <i>Xysticus ulmi</i>            | 1                            |
| Carabidae                       |                              |
| <i>Agonum afrum</i>             | 1                            |
| <i>Agonum emarginatum</i>       | 1                            |
| <i>Agonum sexpunctatum</i>      | 2                            |
| <i>Amara plebeja</i>            | 1                            |
| <i>Amara similata</i>           | 8                            |
| <i>Anchomenus dorsalis</i>      | 1                            |
| <i>Anisodactylus binotatus</i>  | 2                            |
| <i>Asaphidion flavipes</i>      | 3                            |
| <i>Bembidion biguttatum</i>     | 4                            |
| <i>Bembidion deletum</i>        | 51                           |
| <i>Bembidion lampros</i>        | 10                           |
| <i>Bembidion lunulatum</i>      | 1                            |
| <i>Bembidion stomoides</i>      | 1                            |
| <i>Bembidion tetracolum</i>     | 4                            |
| <i>Calodromius spilotus</i>     | 1                            |
| <i>Demetrias atricapillus</i>   | 1                            |
| <i>Diachromus germanus</i>      | 6                            |
| <i>Harpalus latus</i>           | 3                            |
| <i>Harpalus rufipes</i>         | 1                            |
| <i>Leistus rufomarginatus</i>   | 2                            |
| <i>Nebria brevicollis</i>       | 9                            |
| <i>Notiophilus biguttatus</i>   | 3                            |
| <i>Notiophilus rufipes</i>      | 1                            |
| <i>Notiophilus substriatus</i>  | 6                            |
| <i>Ophonus rufibarbis</i>       | 1                            |
| <i>Paranchus albipes</i>        | 2                            |
| <i>Poecilus cupreus</i>         | 2                            |
| <i>Pterostichus strenuus</i>    | 1                            |
| <i>Stenolophus skrimshiraus</i> | 1                            |
| <i>Stenolophus teutonius</i>    | 4                            |
| <i>Trechus quadristriatus</i>   | 6                            |





|                                            | Abundance<br>invert <sup>1</sup> | Richness<br>invert <sup>1</sup> | Abundance<br>EPT <sup>2</sup> | Richness<br>EPT <sup>2</sup> | Richness<br>insects | % insects | Shannon<br>Weiner | Margalef   | Pielous<br>Evenness index | CPUE<br>(richness) |
|--------------------------------------------|----------------------------------|---------------------------------|-------------------------------|------------------------------|---------------------|-----------|-------------------|------------|---------------------------|--------------------|
| <i>Riparian attributes (spatial units)</i> |                                  |                                 |                               |                              |                     |           |                   |            |                           |                    |
| Lds                                        |                                  |                                 |                               | ↑ (0.000478)                 |                     |           |                   |            |                           |                    |
| Tree cover area (Loc300mUP)                |                                  |                                 |                               |                              |                     |           |                   | ↑ (0.0305) |                           |                    |
| <i>Local riparian width attributes</i>     |                                  |                                 |                               |                              |                     |           |                   |            |                           |                    |
| Forest, shrub mean width (Loc100mUP)       |                                  |                                 | ↑ (0.00745)                   | ↑ (0.00269)<br>↑ (0.00109)   |                     |           |                   |            |                           |                    |
| Lds                                        |                                  |                                 |                               |                              |                     |           |                   |            |                           |                    |
| Forest, shrub mean width (Loc200mUP)       |                                  |                                 | ↑ (0.0215)                    | ↑ (0.00779)<br>↑ (0.00083)   |                     |           |                   |            |                           |                    |
| Lds                                        |                                  |                                 |                               |                              |                     |           |                   |            |                           |                    |
| Forest, shrub mean width (Loc300mUP)       |                                  |                                 |                               | ↑ (0.02445)<br>↑ (0.00369)   | ↑ (0.02171)         |           |                   | ↑ (0.0138) |                           |                    |
| Lds                                        |                                  |                                 |                               |                              |                     |           |                   |            |                           |                    |
| Forest, shrub min width (Loc100mUP)        |                                  |                                 |                               | ↑ (0.020172)<br>↑ (0.003216) |                     |           |                   |            |                           |                    |
| Lds                                        |                                  |                                 |                               |                              |                     |           |                   |            |                           |                    |
| Forest, shrub min width (Loc200mUP)        |                                  |                                 | ↑ (0.0346)                    | ↑ (0.00533)<br>↑ (0.00369)   |                     |           |                   |            |                           |                    |
| Lds                                        |                                  |                                 |                               |                              |                     |           |                   |            |                           |                    |
| Forest, shrub min width (Loc300mUP)        |                                  |                                 |                               | ↑ (0.000735)<br>↑ (0.013719) | ↑ (0.0137)          |           |                   | ↑ (0.014)  |                           |                    |
| Lds                                        |                                  |                                 |                               |                              |                     |           |                   |            |                           |                    |
| <i>Full riparian corridor attributes</i>   |                                  |                                 |                               |                              |                     |           |                   |            |                           |                    |
| Forest, shrub (RipCatch100m)               | ↑<br>(0.0258)                    |                                 |                               | ↑ (0.00178)<br>↑ (0.01917)   | ↑ (0.01765)         |           |                   | ↑ (0.0382) |                           |                    |
| Lds                                        |                                  |                                 |                               |                              |                     |           |                   |            |                           |                    |
| Tree cover area (RipCatch100m)             |                                  |                                 |                               | ↑ (0.00167)                  |                     |           |                   | ↑ (0.0146) |                           |                    |



Table S6. S of riparian attributes and other environmental variables.

|                          | Temperature | Mean TIN | Mean TP | Conductivity | pH    | DO saturation | BOD   | Mean stream width | % fine sediments | Catchment size |
|--------------------------|-------------|----------|---------|--------------|-------|---------------|-------|-------------------|------------------|----------------|
| Adjacent_groundcover     | -0.42       | -0.03    | -0.24   | -0.22        | -0.09 | 0.08          | -0.31 | 0.11              | 0.34             | -0.22          |
| Adjacent_vegetation      | -0.15       | 0.13     | -0.17   | -0.31        | -0.10 | 0.21          | -0.21 | -0.11             | 0.08             | -0.52          |
| Bank_stability           | -0.28       | -0.13    | -0.44   | -0.20        | -0.34 | 0.39          | -0.31 | 0.22              | 0.25             | -0.02          |
| Buffer_groundcover       | -0.12       | -0.10    | -0.30   | -0.29        | 0.17  | 0.29          | -0.51 | -0.01             | 0.20             | -0.19          |
| Buffer_intactness        | -0.05       | -0.12    | -0.07   | 0.11         | -0.06 | 0.19          | -0.12 | 0.09              | 0.04             | -0.02          |
| Buffer_vegetation        | 0.08        | -0.10    | -0.26   | -0.17        | -0.03 | 0.17          | -0.29 | 0.00              | 0.18             | -0.30          |
| Buffer_width             | 0.17        | -0.08    | -0.22   | -0.09        | 0.19  | 0.26          | -0.26 | 0.14              | 0.05             | -0.09          |
| Land_slope               | 0.16        | -0.16    | 0.12    | -0.11        | 0.19  | -0.07         | 0.08  | 0.29              | -0.46            | 0.55           |
| Livestock_access         | 0.30        | 0.11     | 0.07    | -0.18        | -0.14 | 0.11          | 0.13  | 0.14              | -0.22            | 0.03           |
| Rills_channels           | 0.15        | 0.26     | -0.02   | 0.26         | 0.27  | 0.34          | -0.24 | -0.12             | 0.04             | -0.14          |
| Riparian_soil            | 0.20        | 0.15     | -0.23   | 0.17         | 0.20  | 0.35          | -0.38 | -0.22             | 0.03             | -0.19          |
| Shading                  | 0.06        | 0.19     | -0.12   | -0.09        | 0.10  | 0.21          | -0.05 | 0.00              | 0.04             | -0.27          |
| Soil_drainage            | -0.21       | 0.02     | -0.04   | -0.10        | 0.04  | 0.04          | -0.08 | 0.19              | -0.25            | 0.07           |
| RCI                      | 0.03        | 0.03     | -0.23   | -0.17        | 0.14  | 0.31          | -0.31 | 0.08              | -0.02            | -0.16          |
| Tree_richness            | 0.07        | -0.02    | -0.29   | -0.09        | 0.12  | 0.16          | -0.19 | 0.26              | 0.25             | -0.05          |
| Total_trees_count        | 0.05        | -0.11    | -0.21   | -0.07        | -0.09 | -0.02         | -0.03 | 0.31              | 0.20             | 0.05           |
| Percent_cov_average      | 0.11        | 0.10     | -0.09   | -0.07        | -0.03 | -0.02         | 0.01  | -0.01             | 0.09             | -0.23          |
| Bare_gro                 | 0.09        | -0.26    | -0.29   | -0.05        | -0.17 | -0.04         | -0.22 | 0.28              | 0.19             | 0.02           |
| Herb                     | -0.04       | -0.16    | -0.03   | 0.13         | -0.27 | -0.11         | -0.08 | 0.31              | -0.06            | -0.05          |
| Impervious               | 0.13        | 0.06     | -0.01   | 0.09         | 0.07  | 0.01          | 0.17  | 0.03              | -0.23            | 0.21           |
| Man_grs                  | 0.13        | 0.20     | 0.17    | 0.02         | 0.22  | 0.10          | 0.21  | -0.37             | 0.01             | 0.01           |
| Unm_grs                  | -0.21       | -0.42    | -0.15   | -0.22        | -0.34 | -0.15         | -0.07 | 0.29              | -0.05            | 0.48           |
| Moss_lich                | 0.28        | -0.26    | -0.14   | -0.02        | 0.13  | 0.13          | -0.41 | 0.33              | -0.14            | 0.13           |
| Pla_litt                 | 0.11        | 0.00     | -0.22   | 0.02         | 0.06  | 0.10          | -0.16 | 0.37              | -0.03            | 0.00           |
| Rock_bed                 | -0.26       | 0.27     | 0.08    | 0.16         | -0.10 | 0.21          | -0.09 | -0.31             | -0.06            | -0.46          |
| Tree_shr                 | -0.11       | 0.11     | -0.29   | -0.30        | 0.07  | 0.32          | -0.09 | -0.07             | -0.05            | -0.25          |
| Fraxinus_excelsior_count | 0.18        | 0.18     | -0.22   | -0.10        | 0.15  | 0.31          | -0.13 | 0.16              | 0.14             | -0.03          |
| Populus_canadensis_count | 0.40        | 0.19     | 0.25    | 0.44         | 0.03  | -0.22         | 0.29  | 0.00              | -0.19            | 0.08           |
| Total_Akker_100m         | -0.20       | 0.08     | -0.26   | 0.08         | -0.39 | 0.04          | -0.12 | -0.27             | 0.32             | -0.39          |
| Total_Akker_200m         | -0.14       | 0.05     | -0.30   | 0.08         | -0.37 | 0.00          | -0.19 | -0.19             | 0.35             | -0.33          |
| Agricultural_Loc300mUP   | 0.03        | -0.05    | -0.15   | 0.26         | -0.35 | 0.20          | -0.38 | -0.04             | 0.21             | 0.05           |
| Total_Bomen_100m         | -0.10       | 0.10     | -0.14   | -0.15        | 0.14  | 0.14          | -0.12 | 0.22              | -0.02            | -0.22          |
| Total_Bomen_200m         | -0.10       | 0.21     | -0.18   | -0.06        | 0.19  | 0.20          | -0.22 | 0.12              | 0.05             | -0.29          |
| ForestShrub_Loc300mUP    | 0.06        | 0.18     | -0.16   | -0.02        | 0.35  | 0.30          | -0.40 | -0.05             | -0.04            | -0.28          |

|                                         | Temperature | Mean TIN | Mean TP | Conductivity | pH    | DO saturation | BOD   | Mean stream width | % fine sediments | Catchment size |
|-----------------------------------------|-------------|----------|---------|--------------|-------|---------------|-------|-------------------|------------------|----------------|
| Total_Grass_100m                        | 0.10        | -0.25    | 0.11    | 0.05         | 0.03  | -0.19         | 0.08  | -0.21             | 0.05             | 0.27           |
| Total_Grass_200m                        | 0.06        | -0.28    | 0.09    | -0.03        | -0.05 | -0.26         | 0.14  | -0.11             | 0.07             | 0.31           |
| PastureGrassland_Loc300mUP              | -0.06       | 0.02     | 0.23    | 0.24         | 0.11  | -0.18         | 0.37  | -0.23             | 0.08             | 0.14           |
| Total_Gebouwen_100m                     | -0.07       | 0.03     | 0.27    | 0.05         | -0.17 | -0.16         | 0.45  | 0.23              | -0.24            | 0.18           |
| Total_Gebouwen_200m                     | -0.06       | -0.07    | 0.20    | 0.12         | -0.15 | -0.13         | 0.37  | 0.23              | -0.18            | 0.23           |
| UrbanIndustrial_Loc300mUP               | -0.06       | -0.16    | 0.09    | -0.06        | -0.41 | -0.24         | 0.15  | 0.61              | -0.26            | 0.49           |
| WetlandWaterbodies_Loc300mUP            | -0.05       | -0.30    | 0.35    | 0.01         | -0.18 | -0.39         | 0.46  | 0.41              | -0.37            | 0.54           |
| TreeCoverArea_Copernicus_Loc300mUP      | 0.25        | 0.14     | 0.10    | -0.10        | 0.42  | 0.03          | -0.25 | 0.11              | -0.27            | -0.06          |
| TreeCoverDensity_Copernicus_Loc300mUP   | 0.15        | 0.43     | 0.19    | 0.39         | 0.40  | 0.19          | -0.07 | -0.39             | -0.14            | -0.41          |
| Agricultural_Mean_width_Loc300mUP       | 0.25        | -0.32    | -0.24   | 0.00         | -0.15 | 0.34          | -0.62 | -0.01             | -0.06            | 0.12           |
| Width_Mean_Total100                     | -0.07       | 0.27     | -0.09   | -0.05        | 0.27  | 0.21          | -0.14 | 0.20              | -0.07            | -0.18          |
| Width_Mean_Total200                     | 0.03        | 0.25     | -0.12   | 0.21         | 0.32  | 0.26          | -0.24 | 0.11              | -0.05            | -0.17          |
| ForestShrub_Mean_width_Loc300mUP        | 0.11        | 0.25     | -0.16   | 0.01         | 0.35  | 0.33          | -0.39 | 0.00              | 0.00             | -0.23          |
| PastureGrassland_Mean_width_Loc300mUP   | -0.07       | 0.05     | 0.39    | 0.32         | 0.12  | -0.35         | 0.46  | -0.32             | 0.05             | 0.04           |
| UrbanIndustrial_Mean_width_Loc300mUP    | 0.03        | -0.02    | 0.27    | 0.02         | -0.40 | -0.28         | 0.31  | 0.39              | -0.26            | 0.32           |
| WetlandWaterbodies_Mean_width_Loc300mUP | 0.01        | -0.15    | 0.21    | 0.44         | 0.27  | -0.05         | -0.04 | 0.42              | -0.20            | 0.58           |
| Agricultural_Min_width_Loc300mUP        | -0.11       | 0.24     | -0.16   | -0.23        | 0.09  | 0.12          | -0.30 | -0.68             | -0.38            | -0.62          |
| Width_Min_Total100                      | -0.06       | 0.39     | -0.03   | -0.15        | 0.21  | 0.06          | -0.11 | -0.08             | 0.06             | -0.33          |
| Width_Min_Total200                      | 0.00        | 0.37     | -0.03   | 0.24         | 0.34  | 0.12          | -0.16 | 0.01              | 0.08             | -0.22          |



|                                           | Temperature | Mean TIN | Mean TP | Conductivity | pH    | DO saturation | BOD   | Mean stream width | % fine sediments | Catchment size |
|-------------------------------------------|-------------|----------|---------|--------------|-------|---------------|-------|-------------------|------------------|----------------|
| ForestShrub_Min_width_Loc300mUP           | 0.11        | 0.20     | -0.34   | -0.27        | 0.23  | 0.32          | -0.30 | -0.11             | 0.11             | -0.29          |
| PastureGrassland_Min_width_Loc300mUP      | -0.26       | 0.05     | 0.02    | -0.13        | -0.02 | -0.15         | 0.17  | -0.21             | 0.21             | -0.10          |
| UrbanIndustrial_Min_width_Loc300mUP       | -0.02       | 0.13     | 0.39    | -0.03        | -0.05 | -0.16         | 0.20  | -0.17             | -0.20            | -0.18          |
| WetlandWaterbodies_Min_width_Loc300mUP    | 0.34        | -0.22    | 0.18    | 0.00         | 0.20  | -0.30         | 0.08  | -0.01             | -0.06            | 0.16           |
| Agricultural_Max_width_Loc300mUP          | 0.21        | -0.23    | -0.13   | -0.01        | -0.18 | 0.33          | -0.54 | -0.03             | 0.08             | 0.15           |
| TreeCoverArea_Copernicus_RipCatch100m     | -0.21       | 0.08     | -0.10   | -0.15        | 0.19  | 0.19          | -0.19 | 0.27              | -0.10            | -0.09          |
| TreeCoverDensity_Copernicus_RipCatch100m  | -0.16       | 0.06     | -0.14   | -0.01        | 0.24  | 0.26          | -0.28 | 0.18              | -0.06            | -0.12          |
| Agricultural_RipCatch100m                 | 0.32        | 0.10     | -0.20   | 0.01         | 0.37  | 0.46          | -0.49 | -0.02             | -0.08            | -0.20          |
| ForestShrub_RipCatch100m                  | -0.15       | -0.10    | 0.41    | 0.36         | 0.02  | -0.40         | 0.45  | -0.16             | 0.22             | 0.07           |
| PastureGrassland_RipCatch100m             | 0.22        | -0.07    | 0.23    | 0.18         | -0.24 | -0.19         | 0.14  | 0.39              | -0.43            | 0.45           |
| UrbanIndustrial_RipCatch100m              | 0.08        | 0.02     | 0.18    | 0.35         | 0.20  | 0.07          | -0.03 | 0.32              | -0.33            | 0.48           |
| WetlandWaterbodies_RipCatch100m           | -0.09       | -0.22    | -0.24   | -0.29        | 0.25  | 0.06          | -0.36 | 0.37              | 0.01             | 0.09           |
| NEAR_DIST_to100mForestBlocks_RipCatch100m | 0.14        | 0.02     | -0.03   | 0.33         | 0.31  | 0.02          | 0.04  | -0.28             | 0.12             | -0.23          |
| NEAR_DIST_to50mForestBlocks_RipCatch100m  | -0.16       | -0.23    | 0.10    | -0.06        | -0.27 | -0.01         | 0.04  | -0.10             | -0.19            | -0.08          |
| NEAR_DIST_to25mForestBlocks_RipCatch100m  | 0.00        | -0.26    | -0.22   | -0.18        | 0.31  | 0.06          | -0.35 | 0.33              | 0.05             | 0.08           |

#### References

1. Burdon, J.F.; Ramberg, E.; Sargac, J.; Forio, A.M.; de Saeyer, N.; Mutinova, T.P.; Moe, F.T.; Pavelescu, O.M.; Dinu, V.; Cazacu, C., *et al.* Assessing the benefits of forested riparian zones: A qualitative index of riparian integrity is positively associated with ecological status in european streams. *Water* **2020**, *12*.

2. Harding, J.S.; Clapcott, J.; Quinn, J.; Hayes, J.; Joy, M.; Storey, R.; Greig, H.; Hay, J.; James, T.; Beech, M., *et al.* *Stream habitat assessment protocols for wadeable rivers and streams of new zealand*. School of Biological Sciences, University of Canterbury: Christchurch, New Zealand, 2009.
